# Supplementary material for: Methane emissions from contrasting production regions within Alberta, Canada: Implications under incoming federal methane regulations
Source: Oxford University Press journal article supplement (doi:10.1525/elementa.341), 2019-01-01
Supplement: elementa-7-341-s1.xlsx [file elementa-7-341-s1.xlsx]

## Sheet: Lloydminster
Status	fac_type	height (m)
Operating	Refinery	10
Operating	Tank Farm	10
Suspended	Refinery	10
Suspended	Tank Farm	10
Operating	Battery	10
Suspended	Battery	10
Operating	Central Treating Plants	7
Operating	Compressor Station	7
Operating	Gas Processing Plant	7
Operating	Injection Plant	7
Operating	Satellite	7
Suspended	Central Treating Plants	7
Suspended	Compressor Station	7
Suspended	Gas Processing Plant	7
Suspended	Injection Plant	7
Suspended	Satellite	7
Operating	Loading Rack	5
Suspended	Loading Rack	5
Operating	Gas Gathering System	2
Operating	Meter and Regulator Station	2
Operating	Meter Station	2
Operating	Pump Station	2
Operating	Regulator Station	2
Operating	Terminals	2
Suspended	Gas Gathering System	2
Suspended	Meter and Regulator Station	2
Suspended	Meter Station	2
Suspended	Pump Station	2
Suspended	Regulator Station	2
Suspended	Terminals	2
COMMINGLED	NA	1
COMMINGLED GAS	NA	1
CYCLICAL CRUDE BITUMEN	NA	1
FLOWING COALBED METHANE - COALS ONLY	NA	1
FLOWING CRUDE BITUMEN	NA	1
FLOWING GAS	NA	1
FLOWING OIL	NA	1
Operating	Pigging Receiver/Launch (NEB)	1
PUMPING CRUDE BITUMEN	NA	1
PUMPING GAS	NA	1
PUMPING OIL	NA	1
SHALE GAS	NA	1
SUS CRUDE BITUMEN	NA	1
Suspended	Pigging Receiver/Launch (NEB)	1
SUSPENDED COALBED METHANE - COALS ONLY	NA	1
SUSPENDED CYCLICAL CRUDE BITUMEN	NA	1
SUSPENDED GAS	NA	1
SUSPENDED OIL	NA	1
SUSPENDED SHALE GAS	NA	1

## Sheet: Peace River
Status	fac_type	height (m)
Operating	Refinery	10
Operating	Tank Farm	10
Suspended	Refinery	10
Suspended	Tank Farm	10
Operating	Battery	10
Suspended	Battery	10
Operating	Central Treating Plants	7
Operating	Compressor Station	7
Operating	Gas Processing Plant	7
Operating	Injection Plant	7
Operating	Satellite	7
Suspended	Central Treating Plants	7
Suspended	Compressor Station	7
Suspended	Gas Processing Plant	7
Suspended	Injection Plant	7
Suspended	Satellite	7
Operating	Loading Rack	5
Suspended	Loading Rack	5
Operating	Gas Gathering System	2
Operating	Meter and Regulator Station	2
Operating	Meter Station	2
Operating	Pump Station	2
Operating	Regulator Station	2
Operating	Terminals	2
Suspended	Gas Gathering System	2
Suspended	Meter and Regulator Station	2
Suspended	Meter Station	2
Suspended	Pump Station	2
Suspended	Regulator Station	2
Suspended	Terminals	2
COMMINGLED	NA	1
COMMINGLED GAS	NA	1
CYCLICAL CRUDE BITUMEN	NA	1
FLOWING COALBED METHANE - COALS ONLY	NA	1
FLOWING CRUDE BITUMEN	NA	1
FLOWING GAS	NA	1
FLOWING OIL	NA	1
Operating	Pigging Receiver/Launch (NEB)	1
PUMPING CRUDE BITUMEN	NA	1
PUMPING GAS	NA	1
PUMPING OIL	NA	1
SHALE GAS	NA	1
SUS CRUDE BITUMEN	NA	1
Suspended	Pigging Receiver/Launch (NEB)	1
SUSPENDED COALBED METHANE - COALS ONLY	NA	1
SUSPENDED CYCLICAL CRUDE BITUMEN	NA	1
SUSPENDED GAS	NA	1
SUSPENDED OIL	NA	1
SUSPENDED SHALE GAS	NA	1

## Sheet: Medicine Hat
Status	fac_type	height (m)
Operating	Battery	7
Suspended	Battery	7
Operating	Central Treating Plants	7
Suspended	Central Treating Plants	7
Operating	Compressor Station	7
Suspended	Compressor Station	7
Operating	Gas Gathering System	2
Suspended	Gas Gathering System	2
Operating	Gas Processing Plant	7
Suspended	Gas Processing Plant	7
Operating	Injection Plant	7
Suspended	Injection Plant	7
Operating	Loading Rack	5
Suspended	Loading Rack	5
Operating	Meter and Regulator Station	2
Suspended	Meter and Regulator Station	2
Operating	Meter Station	2
Suspended	Meter Station	2
Operating	Pigging Receiver/Launch (NEB)	1
Suspended	Pigging Receiver/Launch (NEB)	1
Operating	Pump Station	2
Suspended	Pump Station	2
Operating	Refinery	10
Suspended	Refinery	10
Operating	Regulator Station	2
Suspended	Regulator Station	2
Operating	Satellite	7
Suspended	Satellite	7
Operating	Tank Farm	10
Suspended	Tank Farm	10
Operating	Terminals	2
Suspended	Terminals	2
COMMINGLED	NA	1
COMMINGLED GAS	NA	1
CYCLICAL CRUDE BITUMEN	NA	1
FLOWING COALBED METHANE - COALS ONLY	NA	1
FLOWING CRUDE BITUMEN	NA	1
FLOWING GAS	NA	1
FLOWING OIL	NA	1
PUMPING CRUDE BITUMEN	NA	1
PUMPING GAS	NA	1
PUMPING OIL	NA	1
SHALE GAS	NA	1
SUS CRUDE BITUMEN	NA	1
SUSPENDED COALBED METHANE - COALS ONLY	NA	1
SUSPENDED CYCLICAL CRUDE BITUMEN	NA	1
SUSPENDED GAS	NA	1
SUSPENDED OIL	NA	1
SUSPENDED SHALE GAS	NA	1
