# Supplementary material for: Methane emissions from contrasting production regions within Alberta, Canada: Implications under incoming federal methane regulations
Source: Oxford University Press journal article supplement (doi:10.1525/elementa.341), 2019-01-01
Supplement: elementa-7-341-s2.xlsx [file elementa-7-341-s2.xlsx]

## Sheet: Lloydminster
group_id	CH4_m3day_mean_group (m3/day)	CH4_m3day_median_group (m3/day)	CH4_m3day_mdl_group (m3/day)	CH4_m3day_sd_group (m3/day)	CH4_m3day_se_group (m3/day)	CH4_m3day_min_group (m3/day)	CH4_m3day_max_group (m3/day)
1687	4844.44	4844.44	2.85795	6549.06	4630.88	213.558	9475.32
2912	2340.68	1371.36	1.98664	2399.77	848.446	62.7819	6152.27
1302	2107.1	2107.1	6.96235	NA	NA	2107.1	2107.1
4285	2075.14	1913.94	2.63383	1673.46	966.172	488.116	3823.37
1303	1847.39	1847.39	5.14957	0	0	1847.39	1847.39
2659	1353.4	116.035	0.759491	1798.34	804.242	0.633081	3322.73
4689	1285.98	1285.98	16.1215	NA	NA	1285.98	1285.98
4257	1002.76	1002.76	37.9967	498.167	352.258	650.504	1355.02
4603	921.95	921.95	20.5947	652.718	461.541	460.409	1383.49
4441	885.273	1267.12	11.491	661.375	381.845	121.583	1267.12
3157	848.558	505.854	0.183252	1109.96	554.978	1.09686	2381.43
3822	841.876	537.448	8.56935	632.203	223.518	122.963	1583.7
1508	739.943	381.138	0.938412	1166.35	131.225	20.0915	8013.61
980	720.72	197.488	2.45809	982.047	231.471	11.2912	2251.04
4516	684.613	821.824	40.2441	237.656	137.211	410.191	821.824
2035	573.98	573.98	2.31046	507.199	253.599	134.733	1013.23
4925	568.268	400.219	7.57581	585.132	292.566	98.6819	1373.95
751	562.003	133.087	5.05342	572.229	172.534	95.0497	1393.68
1520	560.514	456.996	14.4796	398.903	199.452	227.95	1100.11
540	527.048	758.324	10.4456	316.688	141.627	180.133	758.324
3997	504.97	548.958	14.7144	193.787	79.1132	208.967	691.113
2928	489.643	573.537	6.79795	291.748	119.106	127.666	765.682
744	466.371	613.799	14.1015	159.661	36.6286	302.563	613.799
1592	465.508	339.281	9.99559	289.313	83.5176	51.867	844.066
527	450.546	256.838	6.35787	473.653	167.462	20.554	994.498
892	435.194	360.909	3.83963	448.708	224.354	39.1083	979.848
3317	424.617	366.944	6.34233	358.739	146.455	25.6822	1025.7
6693	417.161	417.161	13.4317	203.954	144.217	272.943	561.378
883	391.17	234.304	1.54742	438.694	219.347	62.535	1033.54
1380	358.344	321.263	18.5868	170.303	69.5258	162.145	606.904
3861	346.848	248.992	24.7601	169.491	97.8557	248.992	542.559
1151	346.292	112.417	7.00195	482.354	116.988	10.8443	1309.29
2790	342.615	342.615	31.2343	0	0	342.615	342.615
5604	336.385	336.385	10.0303	267.779	189.349	147.036	525.733
621	335.553	335.553	15.0642	200.975	142.111	193.443	477.664
4647	320.647	320.647	12.1722	294.137	207.986	112.661	528.633
1306	314.388	394.356	21.9019	114.006	50.9851	149.558	394.356
887	310.368	399.648	10.1711	122.252	54.6727	176.448	399.648
3480	307.493	307.493	17.9182	NA	NA	307.493	307.493
2049	301.208	301.208	5.06402	NA	NA	301.208	301.208
992	300.512	130.914	15.1692	293.752	169.598	130.914	639.707
6351	282.12	306.709	23.4746	99.7552	40.7249	148.755	378.979
456	277.428	277.428	13.3661	197.294	139.508	137.921	416.936
5603	250.513	250.513	1.77882	290.221	205.217	45.2957	455.73
3745	236.041	137.645	3.76294	234.17	62.5845	38.1279	588.553
3068	220.078	170.132	13.7367	140.133	57.2089	35.2943	388.039
2913	213.894	309.97	8.99767	166.409	96.0764	21.741	309.97
2800	212.509	212.509	24.8663	144.256	102.005	110.505	314.514
2029	211.826	211.826	1.02285	289.766	204.895	6.93019	416.721
853	211.279	68.6612	1.69972	310.473	155.236	33.303	674.49
2784	208.238	249.852	6.83073	72.0775	41.614	125.01	249.852
451	198.041	128.233	10.2665	180.491	73.6853	15.6369	420.584
1789	179.006	115.874	15.0745	230.926	94.2753	16.2038	635.184
1518	176.106	176.106	7.24047	119.371	84.4084	91.6979	260.515
4286	172.778	172.778	27.7675	NA	NA	172.778	172.778
3472	161.821	161.821	9.59337	83.3549	58.9408	102.88	220.762
856	158.069	73.2868	4.85758	208.061	120.124	5.78527	395.135
4014	152.691	152.691	21.0205	1.1929	0.84351	151.847	153.534
2028	142.471	189.891	6.15803	88.4132	51.0454	40.4643	197.059
5007	140.199	140.199	29.1608	67.057	47.4164	92.7823	187.615
1021	133.318	133.318	25.729	94.9406	67.1331	66.1852	200.451
2760	130.873	103.714	9.45074	116.16	58.0798	29.1557	286.907
4584	129.735	52.6837	13.9993	133.456	77.0511	52.6837	283.837
3841	125.648	74.6723	8.63158	140.765	81.2709	17.4726	284.8
1015	125.477	98.9609	8.99448	47.9506	27.6843	96.6402	180.829
4376	124.776	124.776	6.90962	NA	NA	124.776	124.776
3605	123.42	27.7021	1.18183	181.4	104.732	9.92615	332.632
2866	113.813	81.0655	5.88265	82.5694	33.7088	25.2869	216.089
2604	112.941	112.941	2.51969	101.751	71.9488	40.9925	184.89
3111	112.183	84.2849	2.82929	116.718	58.3589	17.5893	262.574
4204	107.589	107.589	5.36734	NA	NA	107.589	107.589
5901	102.344	79.0526	9.75693	68.6899	22.8966	34.515	233.493
2263	100.798	100.798	13.5005	50.4356	35.6634	65.1344	136.461
846	99.259	99.259	17.5106	65.4415	26.7164	39.5193	158.999
5625	98.821	90.1268	5.16139	77.9358	44.9963	25.5968	180.739
812	97.8124	97.8124	22.0469	71.8423	50.8002	47.0122	148.613
3629	96.9616	96.9616	3.63999	128.957	91.1865	5.77516	188.148
2542	95.4935	71.7188	0.40833	93.7718	46.8859	12.1093	226.427
2630	92.3569	97.1983	10.3463	27.591	9.197	58.3539	121.518
2952	92.1531	85.1811	4.26395	88.6743	51.1961	7.17057	184.108
1186	90.4359	68.6256	4.08214	67.6207	10.9695	9.71607	211.679
4451	89.0583	89.0583	8.37025	0	0	89.0583	89.0583
1488	87.1885	56.6265	16.2993	86.9458	43.4729	20.6913	214.81
1509	86.9346	47.9493	5.30075	99.0082	49.5041	19.5136	232.326
2419	85.865	85.865	5.03414	38.7255	27.383	58.482	113.248
4030	84.5832	78.2453	15.4371	49.4964	20.2068	26.5237	142.635
2861	84.0346	84.0346	22.0667	NA	NA	84.0346	84.0346
4755	82.4994	82.4994	25.9135	43.1573	30.5168	51.9826	113.016
486	76.1714	60.6892	4.92017	49.6826	20.2828	11.0427	135.425
5958	75.0441	109.234	3.54203	59.2183	34.1897	6.66462	109.234
6220	73.5451	98.182	26.6044	30.7276	11.614	40.6958	98.182
1498	73.4573	73.4573	9.93283	55.9599	39.5696	33.8877	113.027
1354	73.4456	66.2978	7.88049	56.2253	19.8786	11.1963	167.628
1112	73.2015	73.2015	27.7993	35.2743	24.9427	48.2587	98.1442
1590	73.0198	73.0198	9.26268	NA	NA	73.0198	73.0198
4750	72.9036	72.9036	20.6019	56.6911	40.0867	32.8169	112.99
1153	72.5153	72.5153	32.2519	37.0706	26.2129	46.3024	98.7281
1292	71.3282	71.3282	26.6911	NA	NA	71.3282	71.3282
826	70.893	70.893	18.9932	NA	NA	70.893	70.893
3588	69.313	69.313	23.9283	34.4298	24.3456	44.9674	93.6585
813	69.2231	37.0949	9.21929	78.4953	22.6597	16.9439	231.439
2708	68.7606	68.7606	10.7682	49.9241	35.3016	33.4589	104.062
1127	67.982	67.982	19.6837	47.8577	33.8405	34.1415	101.822
912	67.9591	33.4047	8.18674	72.3984	41.7993	19.3119	151.161
317	67.6325	53.8071	12.4006	47.19	23.595	30.8134	132.103
2726	67.3213	76.9638	1.75919	19.285	9.64252	38.3937	76.9638
794	65.87	40.0648	2.63897	70.6309	28.835	4.3895	155.535
1148	65.6923	64.3316	9.11287	53.5046	18.9167	10.0538	124.052
3969	62.6328	62.6328	14.6548	63.8039	45.1162	17.5166	107.749
369	60.9152	60.9152	37.1704	32.2762	22.8227	38.0924	83.7379
1022	59.3322	16.87	1.59886	74.847	30.5562	1.59871	177.7
2466	58.0586	48.6267	6.95025	45.0276	15.9197	13.9344	121.047
1239	57.9819	57.9819	1.3536	39.9665	28.2606	29.7213	86.2424
4459	57.0929	59.9464	2.50081	43.2712	13.6836	4.33519	109.986
3205	55.3715	55.417	2.32295	45.6803	22.8401	3.48512	107.167
3308	54.5566	54.5566	29.3068	28.6727	20.2747	34.282	74.8313
1771	53.491	49.6369	15.4538	23.3828	7.79428	19.2711	78.4896
1598	52.8699	52.8699	4.90199	62.2811	44.0394	8.83051	96.9093
573	50.1925	44.0155	5.35567	42.2022	21.1011	11.8673	100.872
3659	50.0431	60.1578	16.9979	17.5191	10.1147	29.8138	60.1578
1118	47.1618	22.6812	5.33061	59.2328	29.6164	7.9689	135.316
382	46.9288	27.5264	3.60736	47.8604	15.1348	5.6923	159.249
3380	46.6352	46.6352	29.3983	NA	NA	46.6352	46.6352
3381	45.3228	56.7178	25.5379	19.7367	11.395	22.5328	56.7178
1328	45.31	36.5444	2.76818	30.1628	17.4145	20.5009	78.8847
4504	44.8022	27.4426	6.34649	37.38	21.5813	19.2586	87.7055
2442	43.0496	32.5814	4.33863	33.6421	11.214	8.88977	86.4821
3705	41.9813	29.4499	0.294587	39.8892	9.40198	0.460458	99.4906
2632	40.7396	21.7165	0.74396	52.6613	26.3306	3.10558	116.42
4450	40.5035	38.8223	8.00362	33.056	16.528	9.68561	74.6837
5861	40.4222	34.59	6.28748	32.3157	18.6575	11.4198	75.2568
3656	40.3881	37.8493	3.10329	38.5142	19.2571	6.00534	79.8486
3786	39.6697	32.3542	2.39759	33.9056	9.7877	4.07763	82.5773
5381	38.2862	38.622	0.532131	36.5419	21.0975	1.57752	74.659
2827	37.9088	47.1084	17.1777	15.9342	9.19961	19.5096	47.1084
991	37.3279	27.4421	11.3384	20.9517	6.04823	23.7975	81.9634
4016	37.0818	29.2094	9.05165	24.3278	14.0456	17.6651	64.3709
2380	36.7538	11.3675	0.891674	55.8006	27.9003	4.19071	120.09
2279	36.051	36.5577	1.24938	8.53576	4.92812	27.2732	44.3222
1267	35.2119	35.2119	35.0581	NA	NA	35.2119	35.2119
1581	33.8773	33.8773	0.506636	9.94601	7.03289	26.8444	40.9102
2558	33.2349	33.2349	3.63151	21.6072	15.2786	17.9563	48.5135
3763	33.1509	38.8805	2.69777	12.8604	4.54683	6.87494	40.8091
3098	33.0647	25.8029	3.82198	21.0038	6.06329	5.4857	59.624
2567	31.1531	31.1531	0.811734	27.7709	19.637	11.5161	50.7901
3766	30.7219	37.1034	6.73739	11.0532	6.38155	17.9588	37.1034
2753	28.211	28.211	1.78183	20.8885	10.4443	10.121	46.301
6629	28.0872	33.1092	9.7634	12.2098	3.2632	14.5457	42.4857
2265	26.5077	26.5077	1.68034	29.4988	20.8588	5.64886	47.3665
6245	21.6526	32.9011	2.74557	15.6183	3.32983	3.63595	37.9923
2660	20.5661	20.5661	3.93648	22.0989	15.6263	4.93979	36.1924
2129	19.1253	19.1253	2.90274	10.1692	7.19073	11.9346	26.3161
4492	16.4564	16.4564	6.58297	NA	NA	16.4564	16.4564
414	16.0148	21.6747	9.58574	9.80328	5.65993	4.69493	21.6747
3708	13.9226	13.9226	6.73944	NA	NA	13.9226	13.9226
2502	13.0774	13.0774	9.59575	NA	NA	13.0774	13.0774
3704	12.7419	13.1942	4.81654	4.23349	1.49676	6.22672	16.5439
2333	11.7838	11.7838	1.72465	NA	NA	11.7838	11.7838
3457	11.3552	11.3552	1.84883	NA	NA	11.3552	11.3552
3712	10.6475	10.6475	5.55813	NA	NA	10.6475	10.6475
445	10.3394	8.73154	1.70748	5.78159	2.89079	5.4262	18.4685
3694	9.81356	9.81356	6.00562	NA	NA	9.81356	9.81356
1129	8.96519	5.17117	2.43615	9.96548	4.98274	1.93479	23.5836
3675	7.73716	7.73716	4.34491	NA	NA	7.73716	7.73716
1131	7.31421	7.31421	3.03789	0	0	7.31421	7.31421
406	6.10165	6.10165	5.83242	NA	NA	6.10165	6.10165
3054	5.81804	5.81804	1.47841	NA	NA	5.81804	5.81804
2957	5.38065	5.38065	0.526266	2.89466	2.04683	3.33382	7.42749
6122	5.18422	5.18422	1.64021	NA	NA	5.18422	5.18422
3108	2.97759	3.07695	0.275506	0.426389	0.174072	2.45903	3.39681
1507	2.43057	2.43057	1.15881	0	0	2.43057	2.43057
4452	1.40784	1.40784	1.762	NA	NA	1.40784	1.40784
3223	1.01678	1.01678	0.29884	NA	NA	1.01678	1.01678
1122	0.840003	0.840003	0.569275	0	0	0.840003	0.840003

## Sheet: Peace River
group_id	CH4_m3day_mean_group (m3/day)	CH4_m3day_median_group (m3/day)	CH4_m3day_mdl_group (m3/day)	CH4_m3day_sd_group (m3/day)	CH4_m3day_se_group (m3/day)	CH4_m3day_min_group (m3/day)	CH4_m3day_max_group (m3/day)
2332	890.951	253.52	6.98917	1213.26	271.293	231.014	3271.71
2172	732.268	165.572	0.120128	1095.03	258.102	6.76227	2459.19
1533	442.858	464.164	40.9685	395.106	228.115	37.5299	826.88
424	378.205	177.367	33.115	430.286	152.129	76.187	1094.79
388	310.877	313.511	3.33875	233.474	116.737	36.9312	579.554
1546	221.07	30.0421	2.43745	361.116	136.489	3.38309	923.558
2267	219.022	117.089	16.9148	268.51	134.255	27.3055	614.604
1390	207.608	127.748	11.1275	251.458	38.8008	18.6255	760.451
427	185.436	174.643	15.2022	134.743	47.6389	36.2856	347.887
320	175.758	71.4276	6.73508	189.503	47.3758	56.4352	505.898
428	169.779	67.4153	4.93582	175.426	71.6173	46.0071	395.915
77	150.212	63.1894	2.39701	194.114	68.6298	4.72796	466.372
158	148.934	70.9923	22.5996	146.897	34.6239	19.0596	351.182
1162	135.514	142.839	11.5013	104.755	42.7659	31.2282	238.009
1531	118.244	118.244	87.7066	10.1648	7.18762	111.056	125.432
420	112.243	114.148	2.97597	48.5646	24.2823	61.869	158.808
672	106.079	86.7653	6.88866	56.9063	28.4532	61.3417	189.444
97	94.1257	94.1257	22.4762	64.297	45.4648	48.6608	139.591
1102	85.8249	85.8249	1.09279	119.605	84.5738	1.2511	170.399
481	84.9556	89.71	20.6232	13.1699	3.5198	62.9369	97.4837
475	74.5789	44.6635	4.14321	69.708	28.4582	6.88182	168.851
1656	73.3272	34.6301	0.0740047	73.0815	21.0968	1.56447	171.029
316	70.6244	67.889	13.3144	45.6435	12.1988	25.8769	120.966
2285	69.2331	53.9161	4.41676	39.6199	22.8745	39.5583	114.225
430	64.7492	57.2837	7.64397	52.6143	26.3071	16.6516	127.778
376	64.5515	70.5682	19.5898	24.1445	9.85697	28.873	93.0088
1105	64.3352	34.8628	19.8951	61.4873	35.4997	23.1321	135.011
1762	60.5768	66.6203	3.14951	6.54494	1.50151	53.8618	66.6203
431	50.321	30.4385	13.0777	42.5918	19.0476	22.4721	123.931
336	48.3486	46.6162	14.8609	20.1864	10.0932	25.7403	74.4218
111	46.5088	47.8986	22.9505	13.1348	6.56738	29.9102	60.3279
153	45.8394	37.1674	3.56016	26.3855	6.81271	12.0308	93.8038
1681	38.678	40.6136	2.98814	3.54808	0.774255	32.4839	40.6136
461	37.1699	34.6746	1.84036	23.0611	5.43555	2.27875	72.672
355	35.2721	26.4733	0.995724	33.8128	6.39002	1.90076	99.9243
1443	21.2132	21.2132	5.25742	23.2546	16.4435	4.76977	37.6567
2475	12.8238	13.0461	2.03226	10.0716	1.72727	2.89706	27.9135

## Sheet: Medicine Hat
group_id	CH4_m3day_mean_group (m3/day)	CH4_m3day_median_group (m3/day)	CH4_m3day_mdl_group (m3/day)	CH4_m3day_sd_group (m3/day)	CH4_m3day_se_group (m3/day)	CH4_m3day_min_group (m3/day)	CH4_m3day_max_group (m3/day)
12091	820.17	666.608	1.40077	285.004	22.6023	50.8476	1219.11
4286	290.903	290.903	2.33472	306.801	216.941	73.9622	507.844
10471	248.762	248.762	2.64219	20.952	6.62562	228.885	268.639
17721	199.226	124.976	6.99841	194.472	41.4615	21.9719	457.683
8587	107.891	101.381	2.92722	34.2483	11.4161	72.0037	150.289
4434	96.4529	96.4529	6.83439	0	0	96.4529	96.4529
6884	83.7263	83.7263	8.88106	101.794	71.9789	11.7474	155.705
14612	81.3918	81.3918	2.92657	85.668	60.5764	20.8154	141.968
13961	78.6669	60.8935	5.94562	36.3603	7.13085	41.3866	123.624
6324	75.052	75.052	2.78657	80.0136	56.5781	18.4739	131.63
21635	74.1915	74.1915	1.63863	61.7767	43.6827	30.5088	117.874
14525	73.7983	73.7983	5.7693	88.8992	62.8612	10.9371	136.66
894	67.8343	67.8343	18.4497	NA	NA	67.8343	67.8343
15074	55.9618	58.4692	2.56995	15.0318	3.36121	35.6804	71.2284
6533	55.9451	55.9451	21.5119	0	0	55.9451	55.9451
994	52.1728	52.1728	13.5264	12.5263	8.85744	43.3153	61.0302
13512	51.0596	44.2446	8.14741	44.3907	25.629	10.4704	98.4637
13477	43.9359	43.9359	14.6768	0	0	43.9359	43.9359
6301	43.2234	33.7602	4.57182	27.5059	3.15514	7.55864	71.396
14216	42.3554	42.3554	6.50108	NA	NA	42.3554	42.3554
2310	38.211	31.3633	6.63512	20.001	6.32487	15.3788	60.0843
8993	37.7932	37.7932	1.27529	21.7505	15.3799	22.4133	53.1732
9465	35.9081	35.9081	15.4702	NA	NA	35.9081	35.9081
4426	35.7845	21.5862	7.69824	26.2007	8.73356	12.9623	88.5547
16186	35.1801	36.5108	1.25994	11.7885	6.80607	22.7827	46.2467
9099	34.861	34.861	10.3092	NA	NA	34.861	34.861
14121	33.4179	33.4179	0.86908	28.0483	19.8332	13.5847	53.251
3363	33.3935	18.6795	6.78924	31.8013	18.3605	11.6139	69.8872
8040	31.8595	31.8595	9.4758	2.92456	2.06798	29.7915	33.9274
6536	31.2553	26.6319	7.20954	17.9935	5.99783	13.1794	53.9546
15830	30.5617	30.5617	14.7707	10.2241	7.22954	23.3321	37.7912
14897	28.8511	28.8511	10.7615	14.6632	10.3684	18.4827	39.2195
14787	27.8797	27.8797	14.3278	NA	NA	27.8797	27.8797
1652	27.5535	29.3099	1.596	9.97542	2.87965	2.25911	37.4456
8015	24.5902	24.5902	2.18003	NA	NA	24.5902	24.5902
19590	23.2464	23.2464	11.025	NA	NA	23.2464	23.2464
3473	21.9748	21.9748	2.76737	25.1191	17.7619	4.21289	39.7367
7468	21.3683	21.3683	8.50146	NA	NA	21.3683	21.3683
7776	21.1121	21.1121	14.5149	NA	NA	21.1121	21.1121
21073	20.0747	20.0747	2.90922	15.1027	7.55134	6.99543	33.1541
15211	20.006	20.006	5.9751	1.09374	0.773392	19.2326	20.7794
6326	19.8908	19.8908	16.0805	NA	NA	19.8908	19.8908
7220	18.9529	18.9529	1.90157	24.0265	16.9893	1.96363	35.9422
9362	18.8921	18.8921	1.12788	25.0383	17.7047	1.1874	36.5969
6395	18.4127	18.4127	4.37411	20.4984	14.4946	3.91818	32.9073
8268	18.0848	18.0848	7.52454	NA	NA	18.0848	18.0848
12641	17.5499	17.5499	15.1338	NA	NA	17.5499	17.5499
6435	17.3828	17.3828	11.3096	NA	NA	17.3828	17.3828
6953	17.1504	17.0291	8.55901	6.23523	1.66644	9.87435	27.0324
17639	17.137	20.4565	5.16544	5.74964	3.31956	10.4978	20.4565
5938	15.7876	16.1976	0.684767	14.8852	8.59399	0.701607	30.4636
6903	15.6887	15.6887	8.44619	NA	NA	15.6887	15.6887
21080	14.9141	14.9141	5.36575	NA	NA	14.9141	14.9141
7275	14.7769	14.7769	2.03528	NA	NA	14.7769	14.7769
7774	14.2398	14.2398	10.3856	NA	NA	14.2398	14.2398
10804	14.1476	14.1476	3.31518	13.6767	9.67087	4.4767	23.8184
4093	13.7152	13.7152	1.10193	11.3285	8.01049	5.70468	21.7257
7783	13.1432	13.1432	4.48523	NA	NA	13.1432	13.1432
21089	12.5354	11.2734	2.55565	7.21309	2.40436	4.50944	27.9566
12067	11.8012	11.8012	5.97257	7.32836	5.18194	6.61922	16.9831
4263	11.6848	11.6848	13.5091	NA	NA	11.6848	11.6848
6937	11.6252	11.6252	5.07453	NA	NA	11.6252	11.6252
6303	11.3316	11.3316	0.443963	9.87619	4.93809	2.77859	19.8847
14753	11.1724	11.1724	6.21026	2.93797	2.07746	9.09496	13.2499
7182	10.4314	10.4314	10.6662	NA	NA	10.4314	10.4314
7719	10.063	10.063	5.1781	NA	NA	10.063	10.063
8564	9.50327	9.50327	3.43335	NA	NA	9.50327	9.50327
6883	9.43316	9.43316	2.32683	9.25062	6.54117	2.89198	15.9743
7909	9.22888	9.22888	1.68828	8.72742	6.17122	3.05767	15.4001
13669	8.93707	8.93707	1.43626	9.97554	7.05377	1.8833	15.9908
7690	8.52061	8.52061	1.52701	6.94867	4.91345	3.60716	13.4341
14361	8.51219	8.51219	2.96386	6.72384	4.75447	3.75772	13.2667
4568	7.666	7.666	1.5021	5.2249	3.69456	3.97144	11.3606
13148	7.63262	7.63262	3.16791	NA	NA	7.63262	7.63262
11420	7.02857	7.02857	2.64135	NA	NA	7.02857	7.02857
8391	6.55069	6.55069	4.82715	NA	NA	6.55069	6.55069
7699	5.78078	5.78078	1.48606	5.03204	3.55819	2.22259	9.33897
10383	5.38678	5.38678	2.7127	2.40451	1.20225	3.30442	7.46915
10968	5.13579	5.13579	2.55218	1.8095	1.27951	3.85628	6.41529
11792	5.04368	5.04368	1.48757	NA	NA	5.04368	5.04368
4423	5.03672	5.03672	1.17966	NA	NA	5.03672	5.03672
9383	4.7801	4.7801	2.59386	0.306516	0.216739	4.56336	4.99684
5444	4.23776	4.23776	1.74755	NA	NA	4.23776	4.23776
6356	3.90858	3.90858	1.88515	NA	NA	3.90858	3.90858
12772	3.89713	3.89713	0.498738	2.93038	2.07209	1.82504	5.96922
3297	3.74583	3.74583	0.71592	3.9445	2.78918	0.956646	6.53501
5818	3.48795	3.48795	3.73012	NA	NA	3.48795	3.48795
13126	3.40874	3.40874	3.00038	NA	NA	3.40874	3.40874
13812	3.23744	3.23744	2.75888	NA	NA	3.23744	3.23744
4472	2.67093	2.67093	2.28544	NA	NA	2.67093	2.67093
11858	2.44353	2.44353	0.75415	NA	NA	2.44353	2.44353
4250	1.76734	1.76734	1.47449	NA	NA	1.76734	1.76734
7923	0.874536	0.874536	1.37436	NA	NA	0.874536	0.874536
